# Supplementary material for: Cytoplasmic incompatibility management to support Incompatible Insect Technique against Aedes albopictus
Source: PubMed Central journal article supplement (PMC6304776; doi:10.1186/s13071-018-3208-7), 2018-12-24
Supplement: 13071_2018_3208_MOESM4_ESM.pdf [file 13071_2018_3208_MOESM4_ESM.pdf]

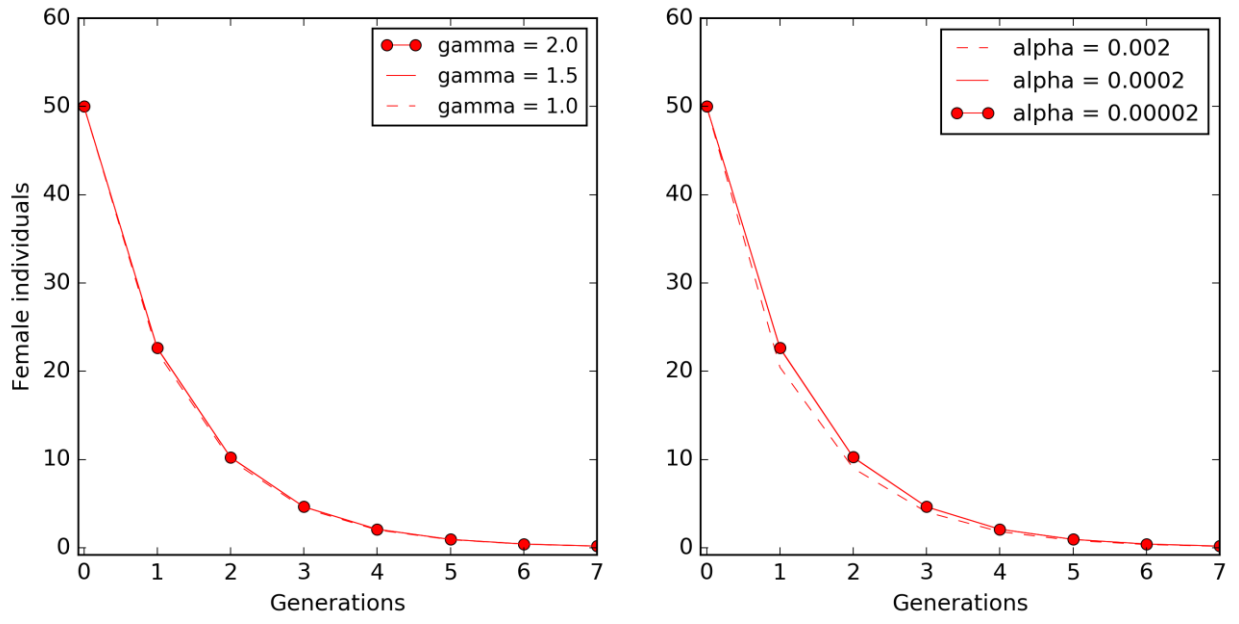

**Figure S1.** Model simulation of the IIT<sub>1</sub> experiment showing how the outcome of the population dynamics is influenced by the variation of  $\gamma$  and  $\alpha$  parameters.
